# Supplementary material for: Dynamic growth program regulated by LANCEOLATE enables flexible leaf patterning
Source: Oxford University Press journal article supplement (doi:10.1242/dev.056770), 2011-01-13
Supplement: dev056770tables1.pdf [file dev056770tables1.pdf]

**Table S1. Primers used in this study**

| Purpose                                    | Sequence (5' to 3')                          | Primer                                          |
|--------------------------------------------|----------------------------------------------|-------------------------------------------------|
| <i>Solanum lycopersicum</i> LANCEOLATE     | TTTCTCAATCCCTGACAGGGAAA                      | LA-F                                            |
|                                            | TCGGTGTATGCCATTGAATCAG                       | LA-R                                            |
| <i>Solanum lycopersicum</i> reference gene | GCTAAGAACGCTGGACCTAATG                       | Expressed-R                                     |
|                                            | TGGGTGTGCCTTTCTGAATG                         | Expressed-F                                     |
|                                            | ACTCCCGCTTCATTCACTCA<br>GGGGAACGATAGGGTTCAAT | premiR319-R<br>premiR319-F                      |
| <i>Solanum melongena</i> TUBULIN           | ATCTGGCCATCAGGCTGGA                          | Eg-Tub-R2 (spans exon-exon border)<br>Eg-Tub-L2 |
|                                            | CCAGAGAAAATGAGAGAGTGCAT                      |                                                 |
| <i>Capsicum annuum</i> TUBULIN             | GCTTTCTGCTCCAGTTTCA                          | Pe-Tub-R2                                       |
|                                            | GAAATGCATGCTGGGA ACTT                        | Pe-Tub-F                                        |
| <i>Solanum tuberosum</i> TUBULIN           | TGCTTTCCAGCTCCAGTTTC                         | Po-Tub-R4                                       |
|                                            | ATTCAGGTCGGAAATGCTTG                         | Po-Tub-F                                        |
| <i>Solanum melongena</i> LANCEOLATE        | ACAGTGCATGCCATTGAATCAG                       | Eg-LA-R                                         |
|                                            | TTTCTCAATCCCTGACAGGGATA                      | Eg-LA-L (spans exon-exon border)                |
| <i>Capsicum annuum</i> LANCEOLATE          | TTCCTGCAGATTGAGCTGTAA                        | Pe-LA-R (spans exon-exon border)<br>Pe-LA-F     |
|                                            | GAAGAAGAGGAGCACGATGG                         |                                                 |
| <i>Solanum tuberosum</i> LANCEOLATE        | TTCCTCTGATTCTCGCCATT                         | Po-LA-R1                                        |
|                                            | ACAGTGCATGCCATTGAATCAG                       | Po-LA-L                                         |
| Promoter LA cloning                        | GGGTACCTTTTCCCACGCAATGCTGCTGCATG             | LA pro L                                        |
|                                            | TCAAATTCGTATCATATCACGCTTAT                   | LA pro R1                                       |
